# Supplementary figures and images for: Exploring the Association between Gut Microbiota and Inflammatory Skin Diseases: A Two-Sample Mendelian Randomization Analysis
Source: MDPI journal article supplement (doi:10.3390/microorganisms11102586), 2023-10-19

# MR Method

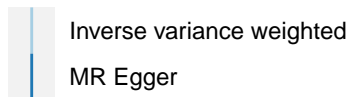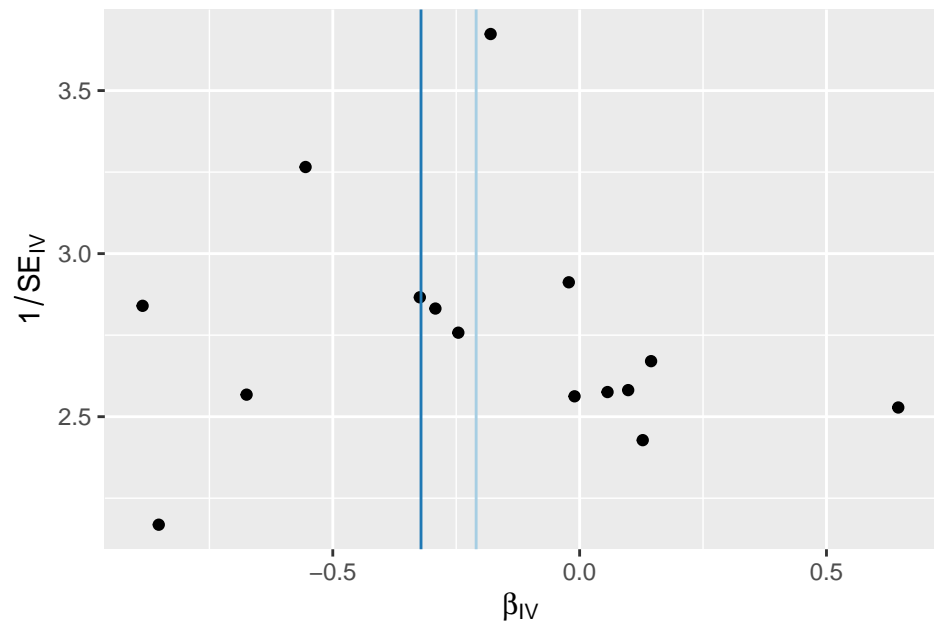

Supplement: s1 [file s1]

## MR Method

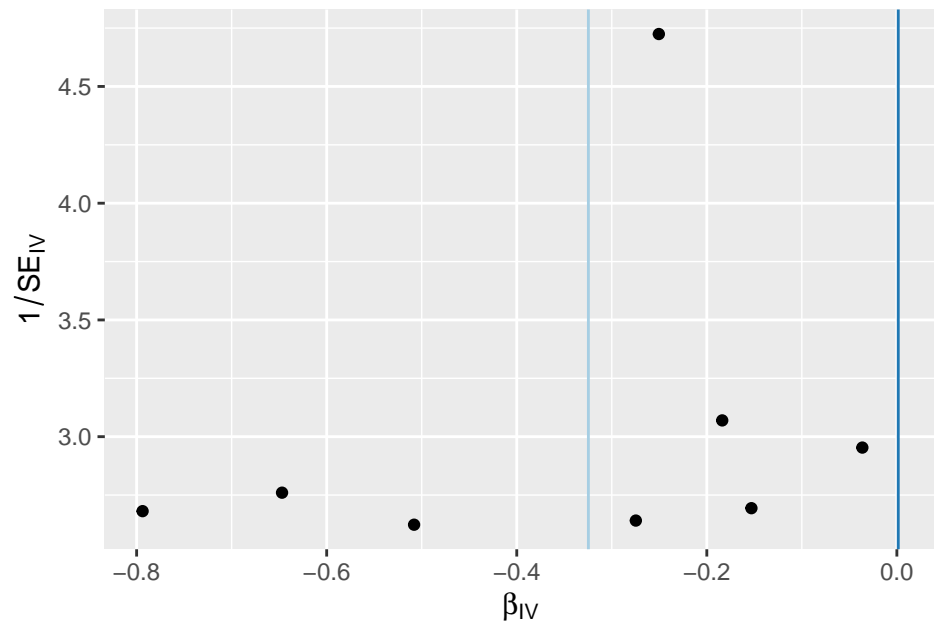

Supplement: s1 [file s1]

## MR Method

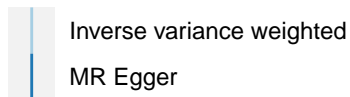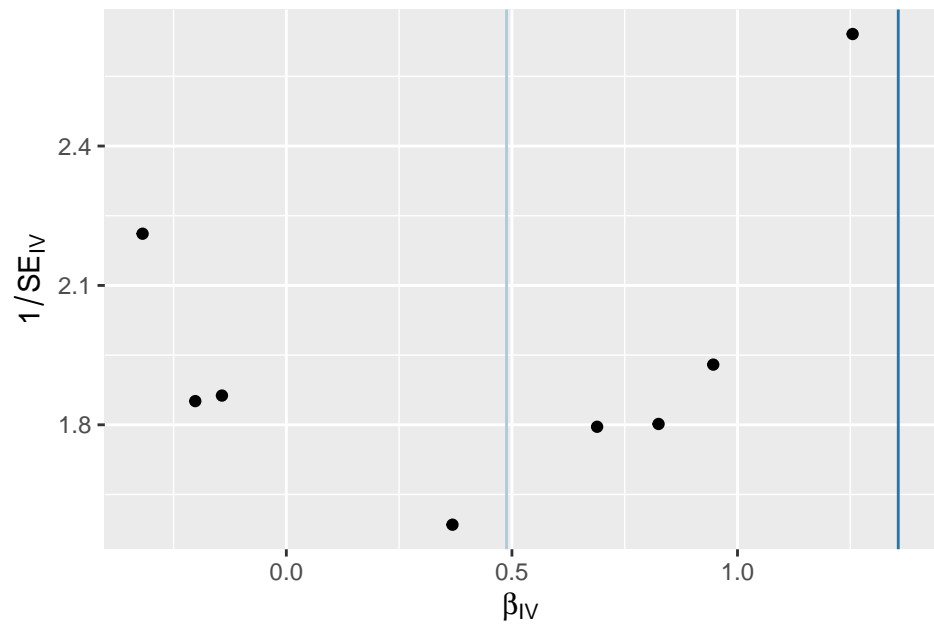

Supplement: s1 [file s1]

## MR Method

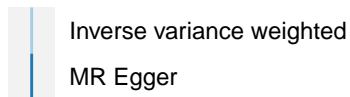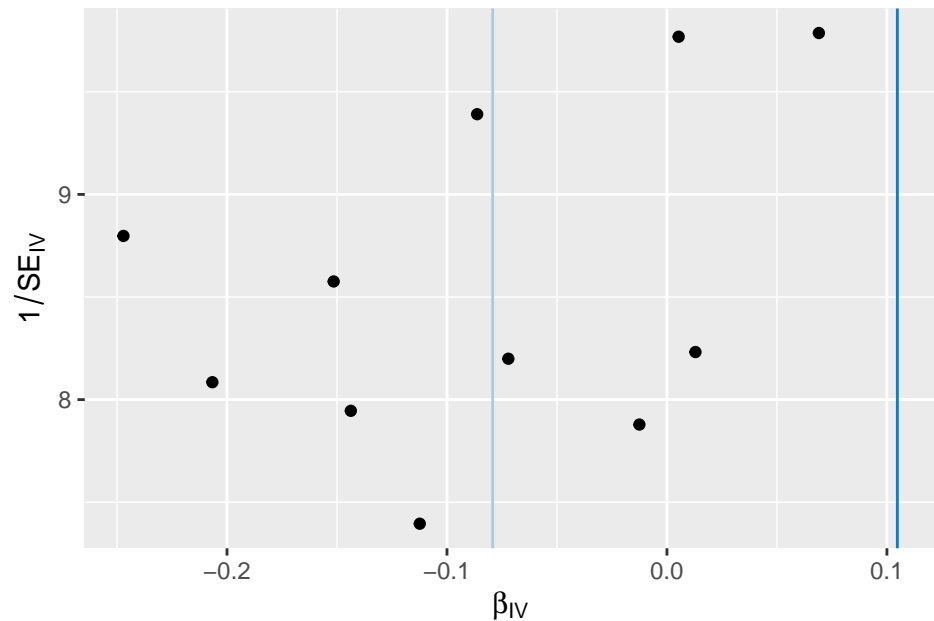

Supplement: s1 [file s1]

# MR Method

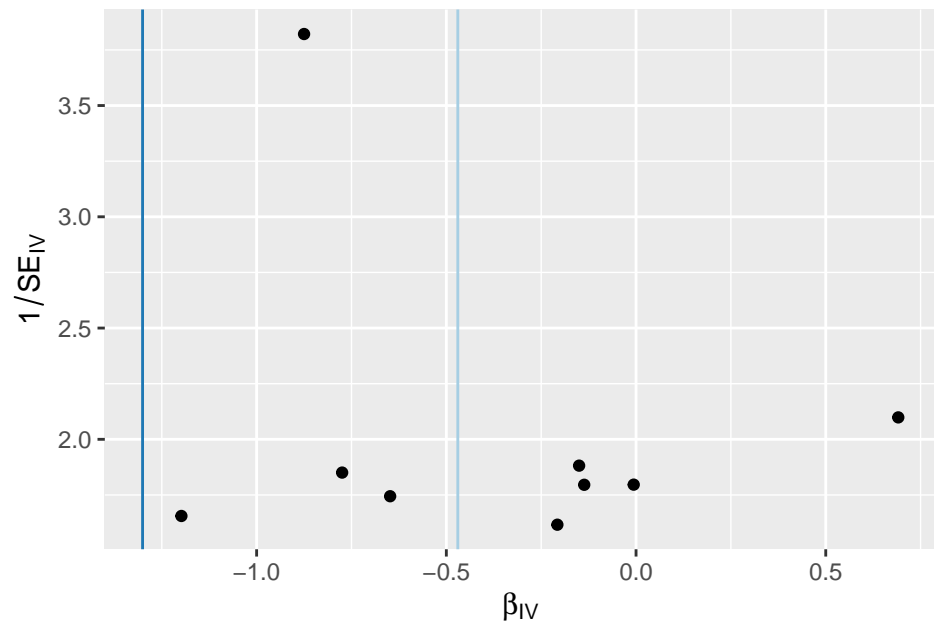

Supplement: s1 [file s1]

## MR Method

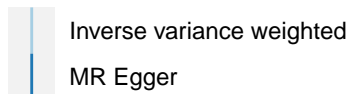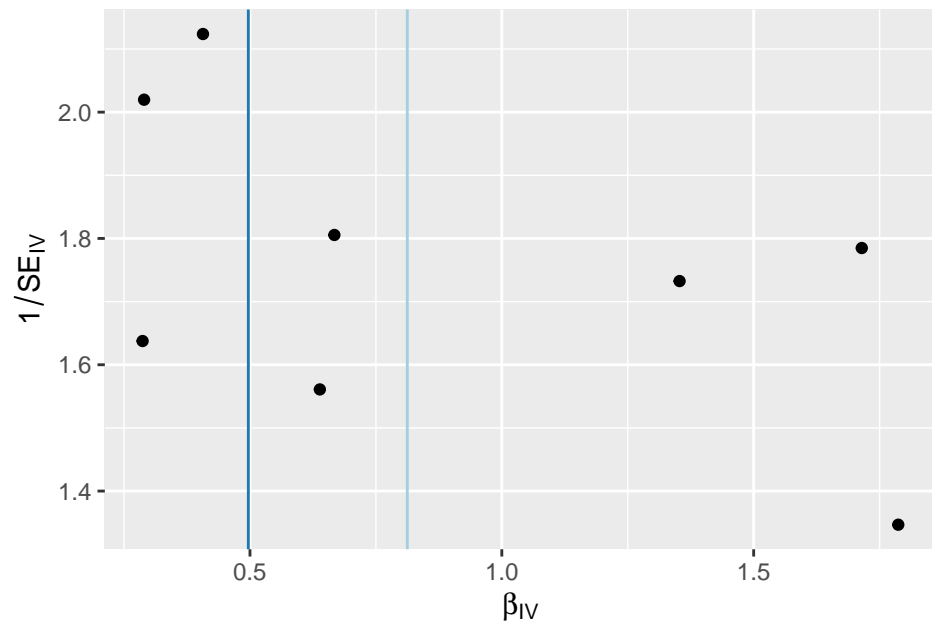

Supplement: s1 [file s1]

# MR Method

- Inverse variance weighted
- MR Egger

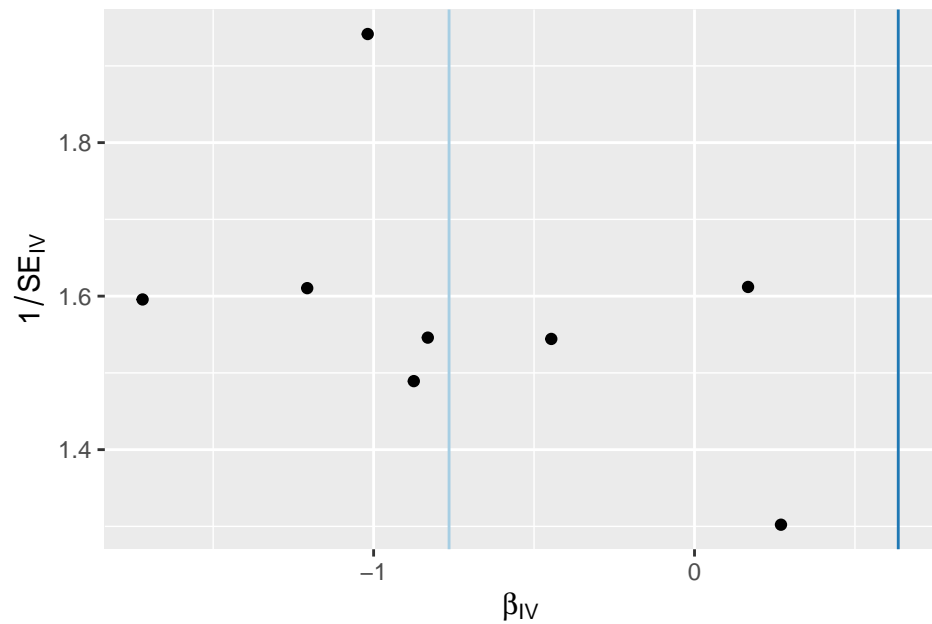

Supplement: s1 [file s1]

# MR Method

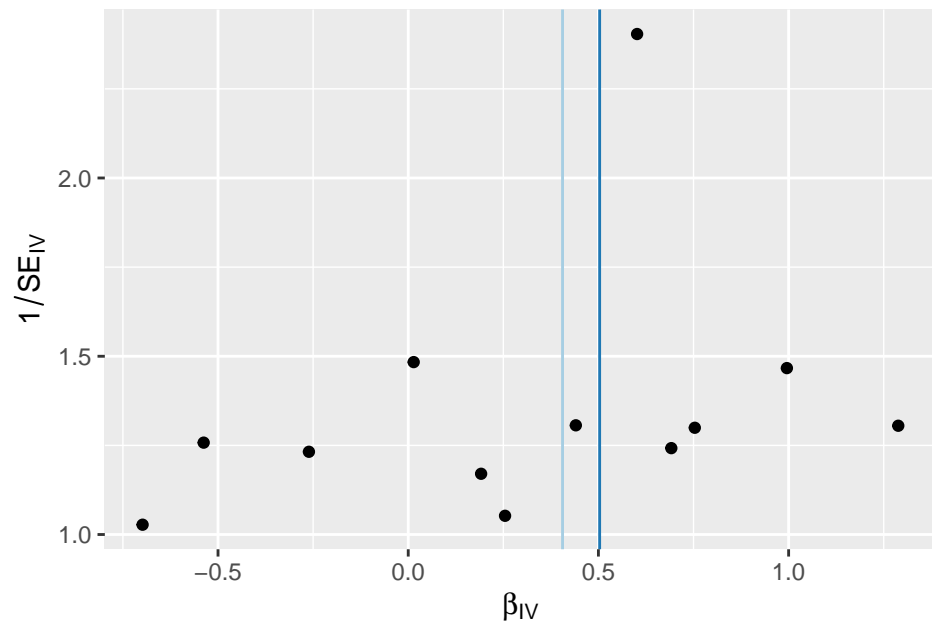

Supplement: s1 [file s1]

## MR Method

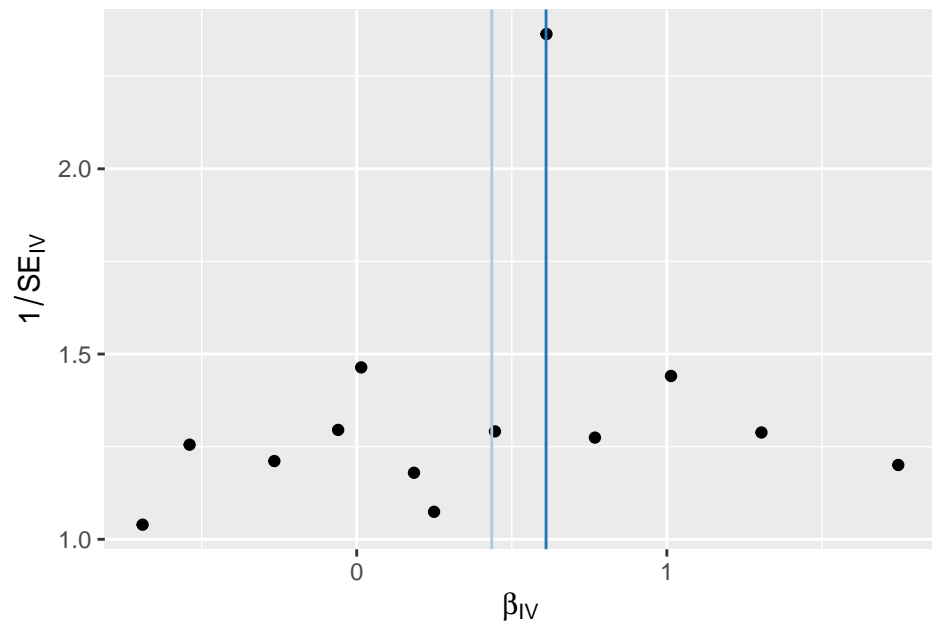

Supplement: s1 [file s1]

# MR Method

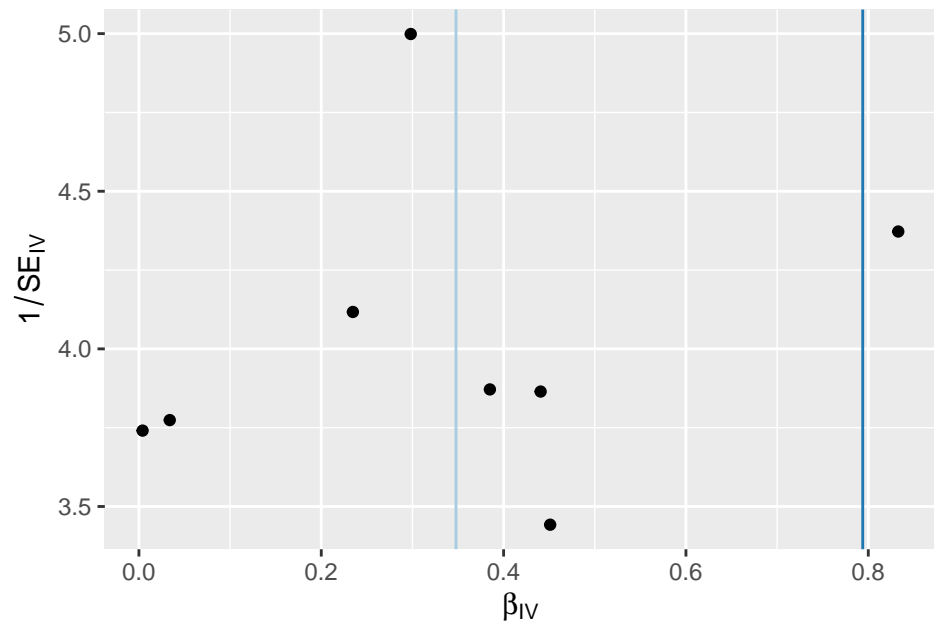

Supplement: s1 [file s1]

# MR Method

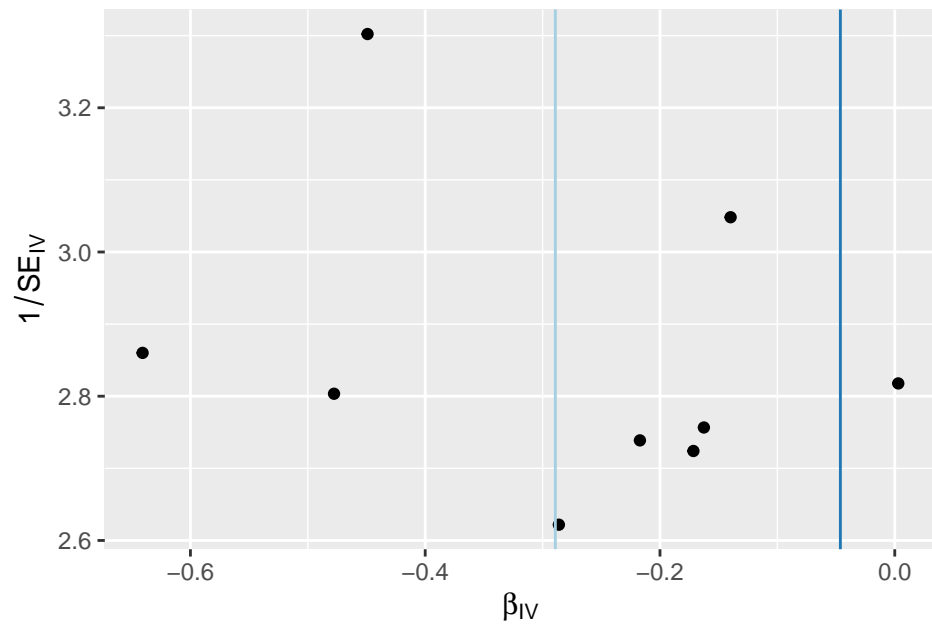

Supplement: s1 [file s1]

# MR Method

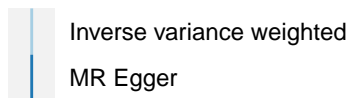

Supplement: s1 [file s1]

# MR Method

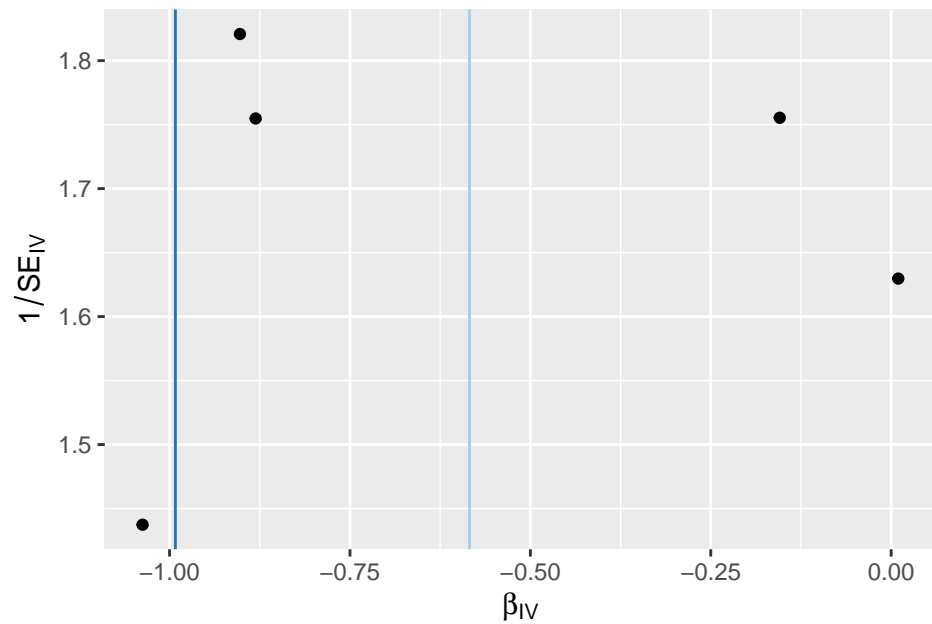

Supplement: s1 [file s1]

# MR Method

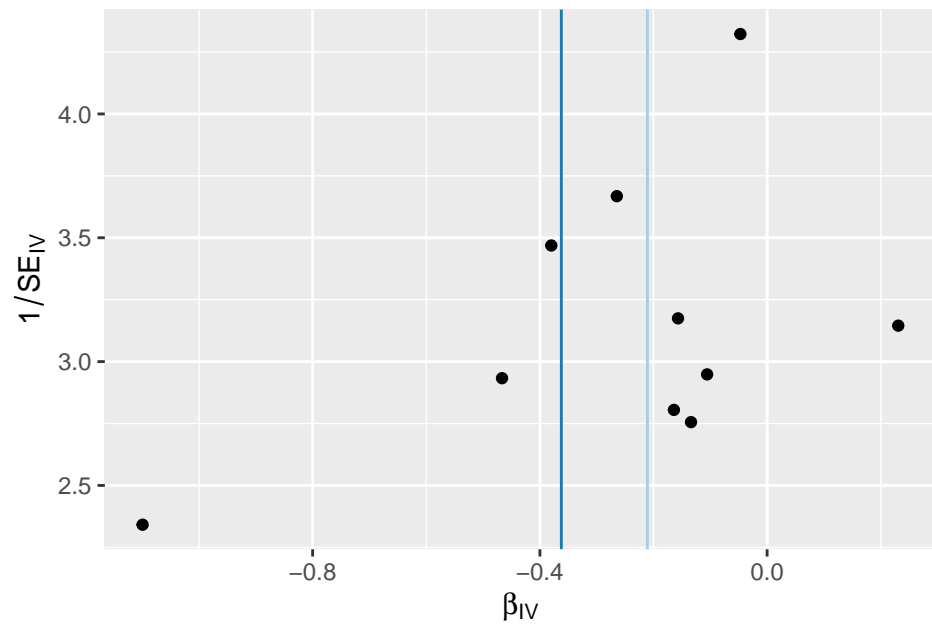

Supplement: s1 [file s1]

## MR Method

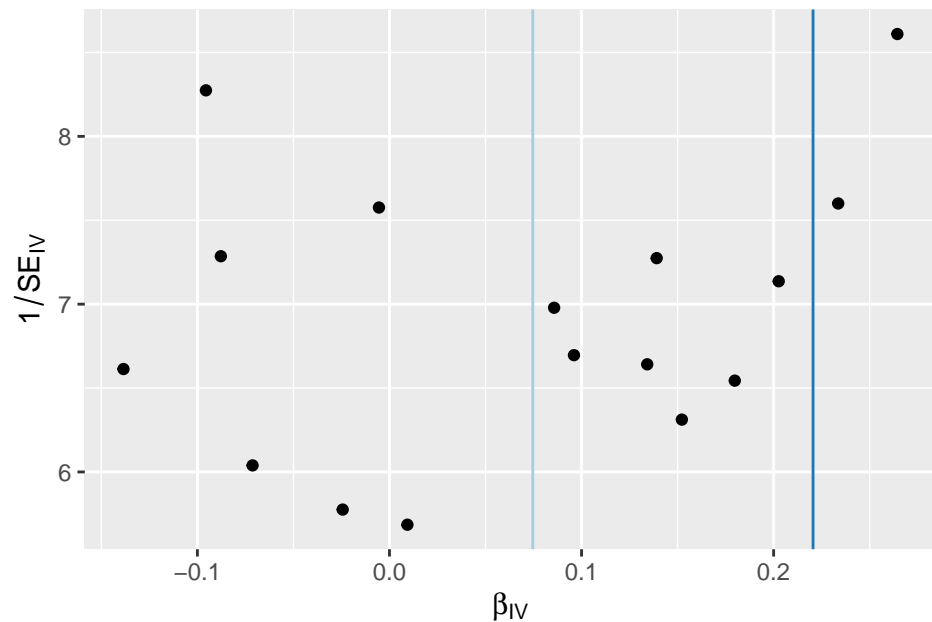

Supplement: s1 [file s1]

# MR Method

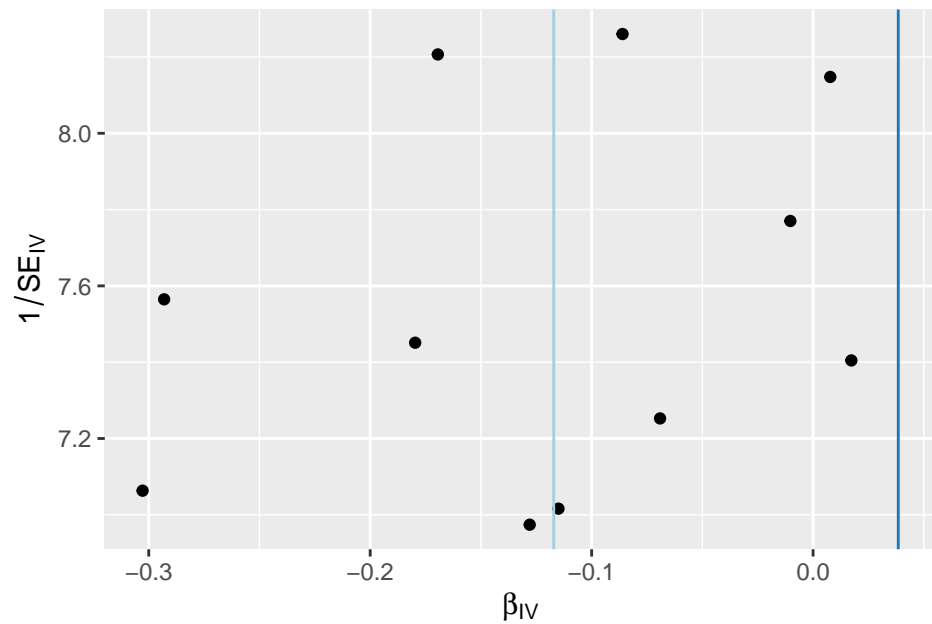

Supplement: s1 [file s1]

# MR Method

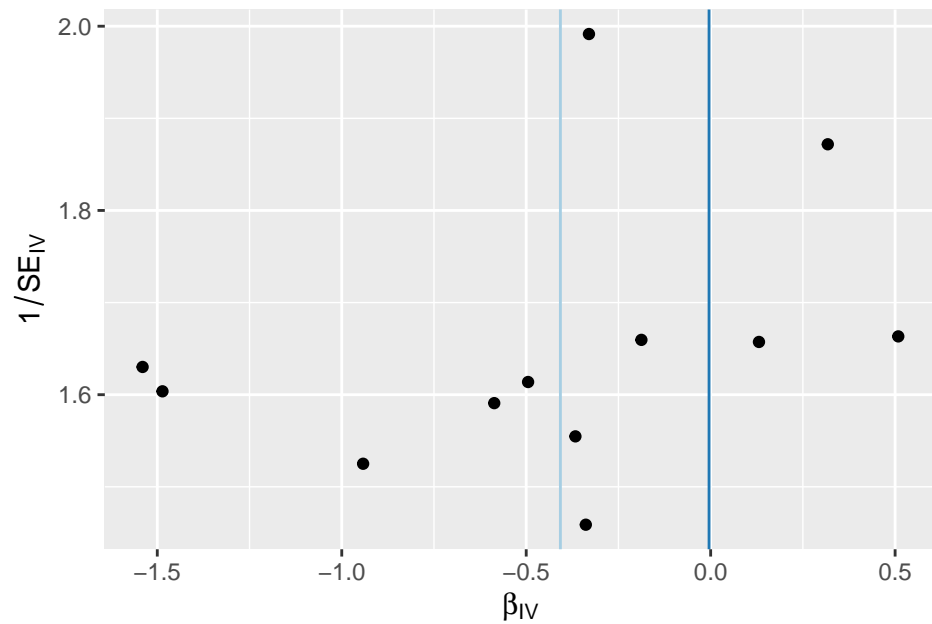

Supplement: s1 [file s1]

# MR Method

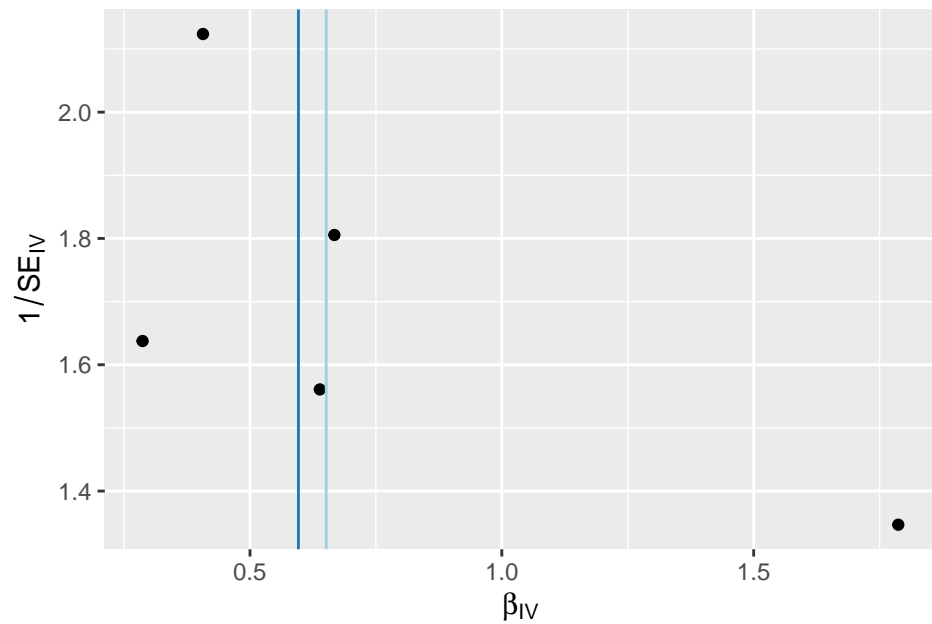

Supplement: s1 [file s1]

# MR Method

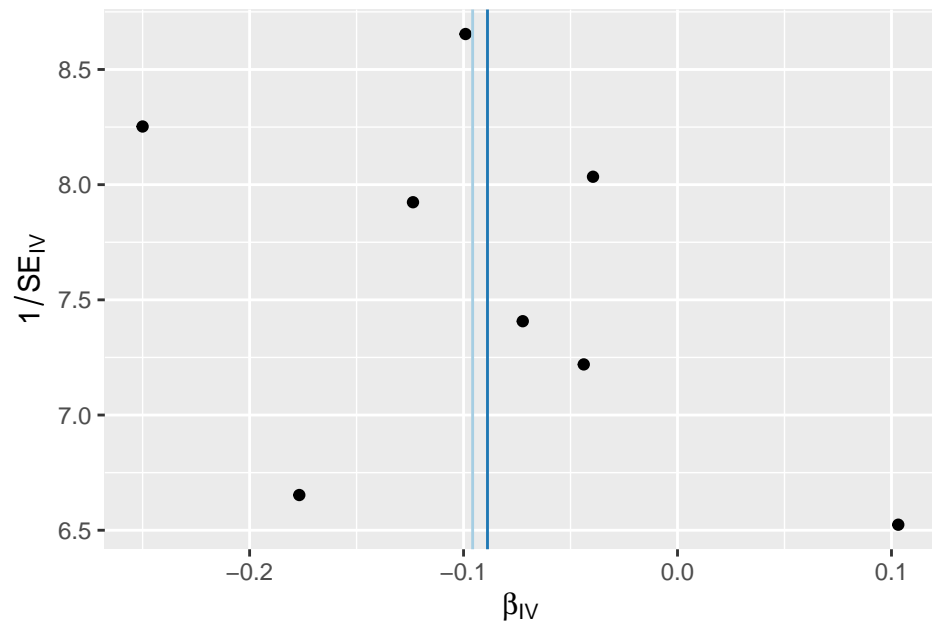

Supplement: s1 [file s1]

## MR Method

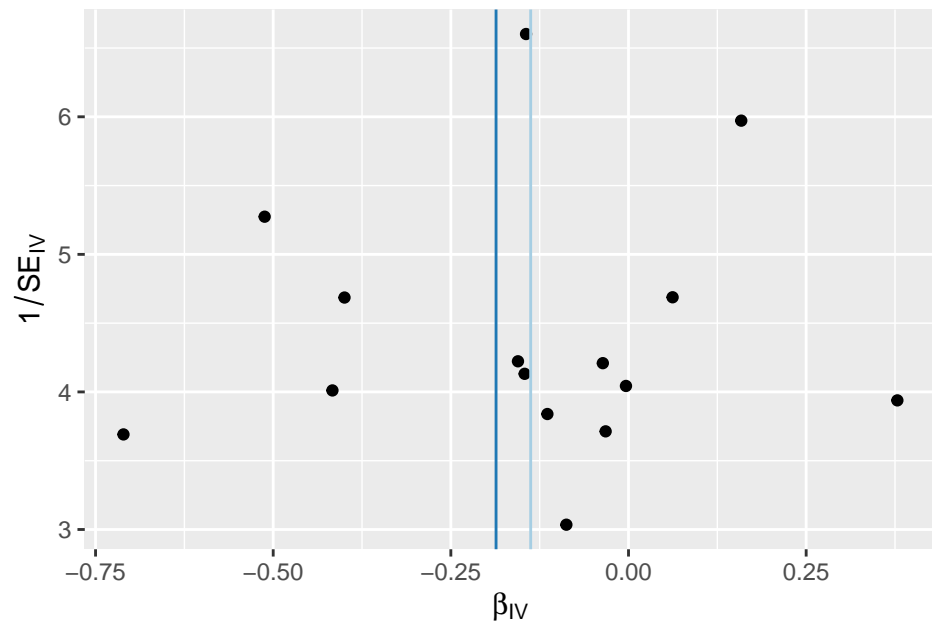

Supplement: s1 [file s1]

# MR Method

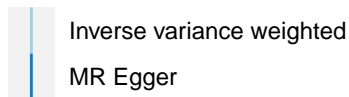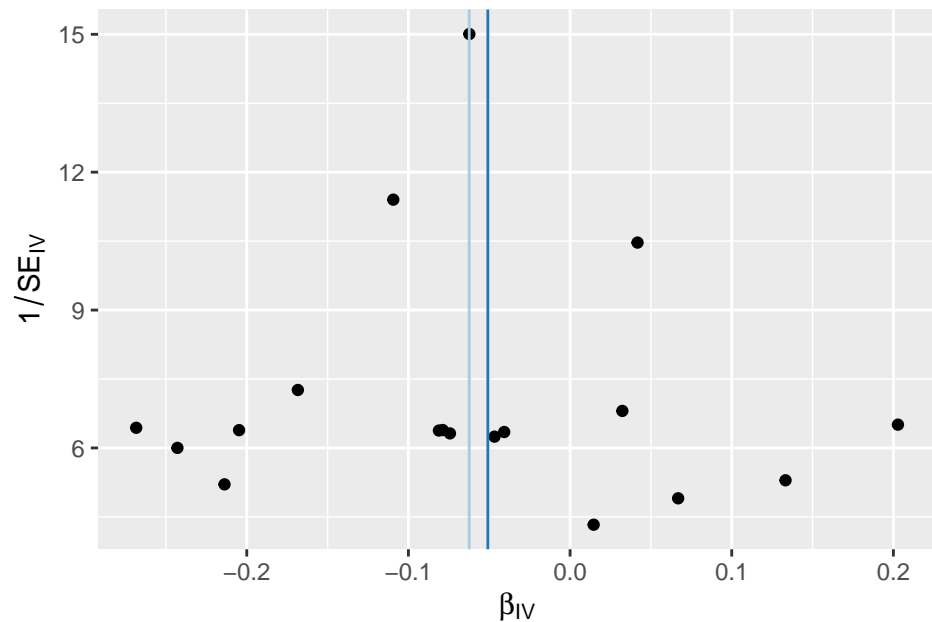

Supplement: s1 [file s1]

## MR Method

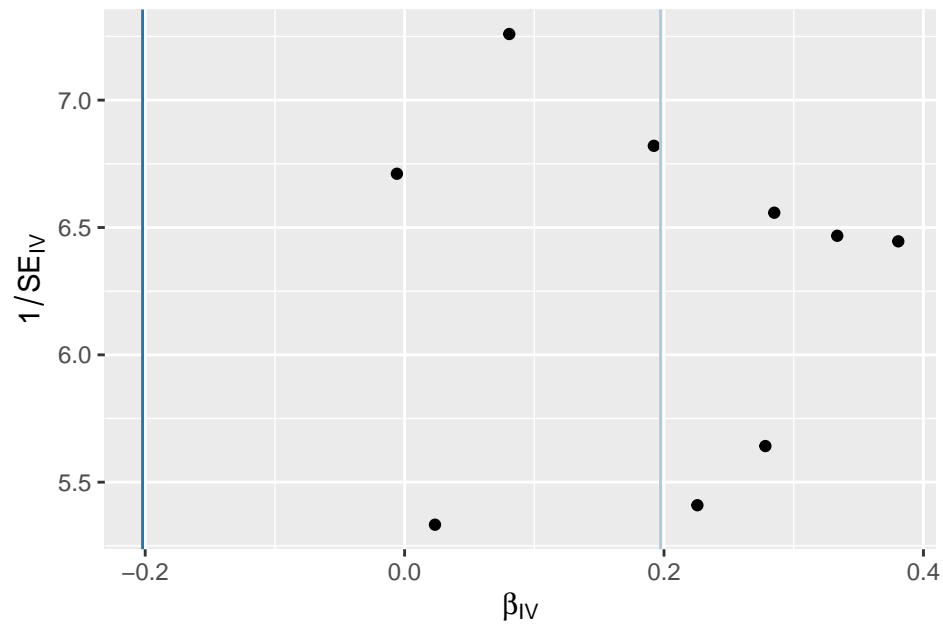

Supplement: s1 [file s1]

## MR Method

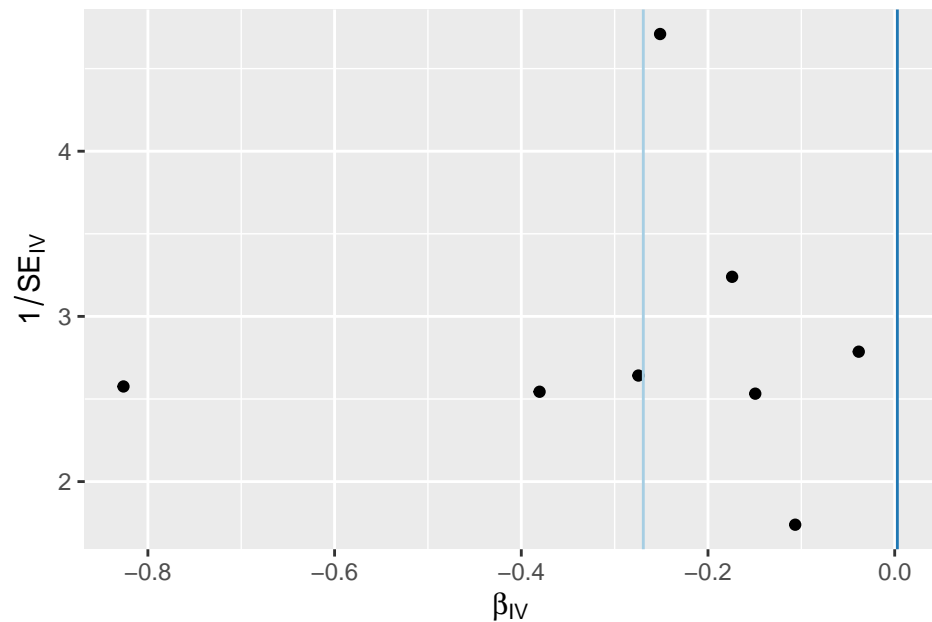

Supplement: s1 [file s1]

# MR Method

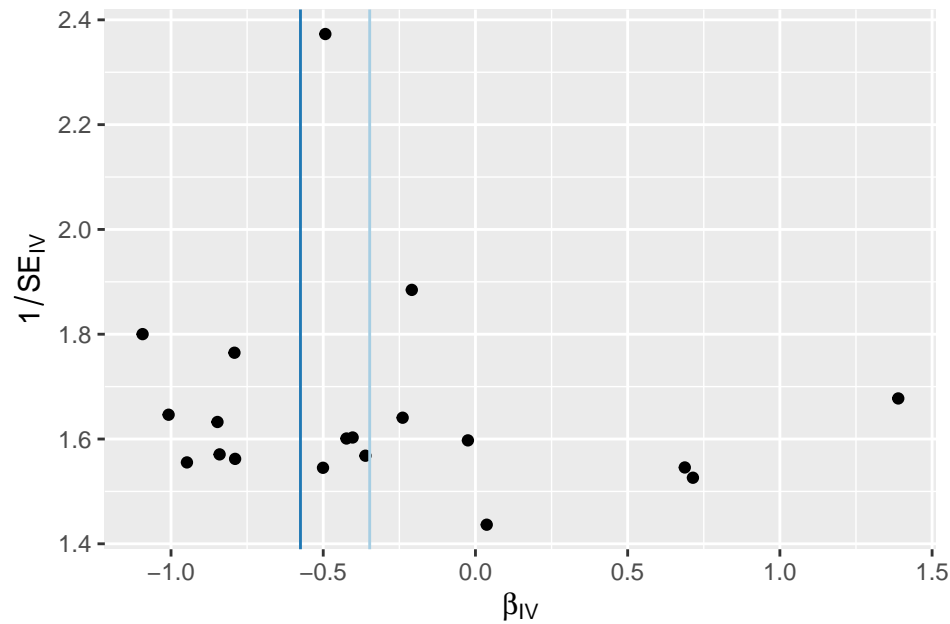

Supplement: s1 [file s1]
